# Supplementary material
Source: PubMed Central journal article supplement (PMC6825559)
Supplement: NIHMS1536815-supplement-1.pdf [file NIHMS1536815-supplement-1.pdf]

**A**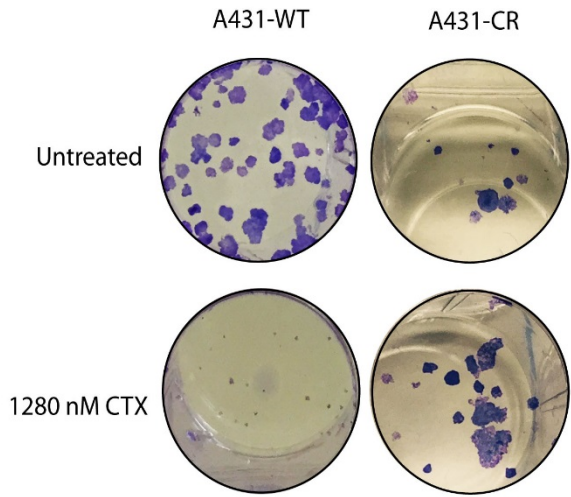**B**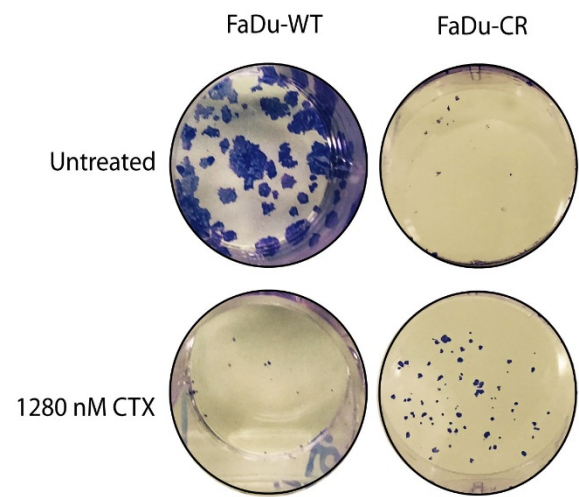

SUPPLEMENTARY FIGURE S1.

**Supplementary Figure 1. Clonogenic survival of A431 and FaDu clones.** (A.) Representative images from the A431 clone populations obtained in the selection process to generate the cetuximab-resistant cell lines are shown. (B.) Representative images from the FaDu clone populations obtained in the selection process to generate the CTX-resistant cell lines are shown.

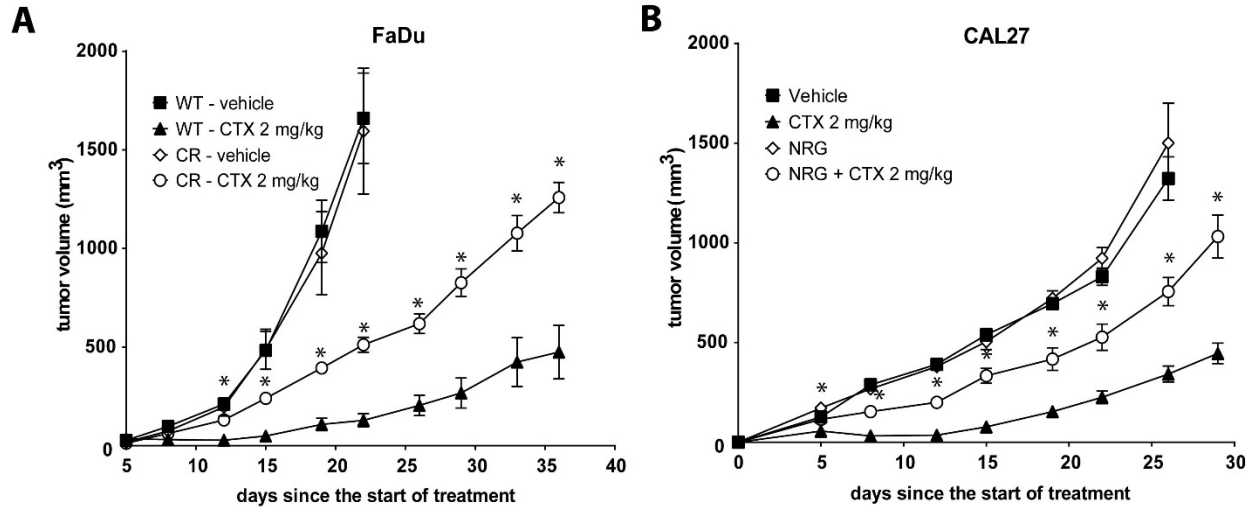

SUPPLEMENTARY FIGURE S2.

**Supplementary Figure 2. *In vivo* models used to explore the therapeutic effects of CDX-3379 in the presence or absence of cetuximab (CTX), neuregulin (NRG) and/or radiotherapy (RT).** (A.) Mice bearing tumors derived from FaDu-WT or FaDu-CR cells received vehicle or 2 mg/kg CTX twice a week I.P. until sacrifice. Values are the means  $\pm$  SE of eight tumors per group. An \* indicates a significant difference ( $p \leq 0.05$ ) compared to the CTX group treatment from the FaDu-WT mice. (B.) Mice bearing tumors derived from CAL27 cells encapsulated in matrigel in the presence or absence of 1 mg per tumor of NRG received a single I.P. injection of vehicle or 2 mg/kg CTX. Values are the means  $\pm$  SE of eight tumors per group. An \* indicates a significant difference ( $p \leq 0.05$ ) compared to the CTX group treatment from the CAL27 with no NRG mice.

**Supplementary Table 1. List of antibodies used in the study.**

| <b>Antibodies</b>                    | <b>dilution</b> | <b>source</b>                                   | <b>identifier</b> |
|--------------------------------------|-----------------|-------------------------------------------------|-------------------|
| <b>rabbit anti-EGFR</b>              | 1:1,000         | Santa Cruz biotechnology, Inc. (Santa Cruz, CA) | sc-03             |
| <b>rabbit anti-pEGFR-Y1068</b>       | 1:1,000         | Cell Signaling (Danvers, MA, USA)               | #3777             |
| <b>rabbit anti-pEGFR-Y845</b>        | 1:1,000         | Cell Signaling (Danvers, MA, USA)               | #6963             |
| <b>rabbit anti-ErbB2</b>             | 1:1,000         | Cell Signaling (Danvers, MA, USA)               | #4290             |
| <b>rabbit anti-pErbB2-Y1221/1222</b> | 1:500           | Cell Signaling (Danvers, MA, USA)               | #2243             |
| <b>rabbit anti-ErbB3</b>             | 1:1,000         | Cell Signaling (Danvers, MA, USA)               | #4754             |
| <b>rabbit anti-pErbB3-Y1289</b>      | 1:1,000         | Cell Signaling (Danvers, MA, USA)               | #4791             |
| <b>rabbit anti-neuregulin</b>        | 1:1,000         | Cell Signaling (Danvers, MA, USA)               | #2573             |
| <b>rabbit anti-AKT</b>               | 1:1,000         | Cell Signaling (Danvers, MA, USA)               | #9272             |
| <b>rabbit anti-pAKT-S473</b>         | 1:1,000         | Cell Signaling (Danvers, MA, USA)               | #4060             |
| <b>rabbit anti-ERK1/2</b>            | 1:1,000         | Cell Signaling (Danvers, MA, USA)               | #4695             |
| <b>rabbit anti-pERK1/2</b>           | 1:1,000         | Cell Signaling (Danvers, MA, USA)               | #4370             |
| <b>anti-GADPH</b>                    | 1:1,0000        | Proteintech (Rosemont, IL, USA)                 | HRP-60004         |
